# Supplementary material
Source: Springer Nature journal article supplement (https://www.springermedizin.de/resource/supplementary/12943_2013_1484_MOESM4_ESM.pdf/9553124)

SW IV-134

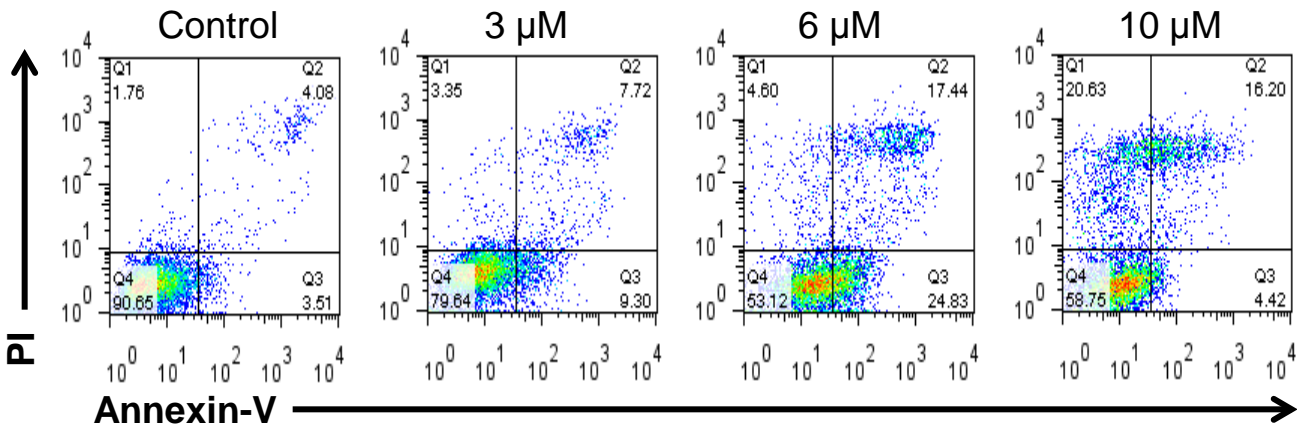

Supplement: MOESM4 [file 9553124]
